# Supplementary material for: Preliminary study on the association between lignan metabolites and CT non-destructive testing of coconut fruit at different developmental stages
Source: PeerJ. 2024 Sep 26;12:e18049. doi: 10.7717/peerj.18049 (PMC11439403; doi:10.7717/peerj.18049)
Supplement: Supplemental Information 1 — Presence of lignan content at local and wenye 5 varieties at different developmental periods [file peerj-12-18049-s001.xls]

## Sheet: Sheet1
Compounds	Class I	Class II	CAS	Level	CK2-1	CK2-2	CK2-3	CK4-1	CK4-2	CK4-3	CK6-1	CK6-2	CK6-3	CK8-1	CK8-2	CK8-3	CK10-1	CK10-2	CK10-3	CK12-1	CK12-2	CK12-3	W5-2-1	W5-2-2	W5-2-3	W5-4-1	W5-4-2	W5-4-3	W5-6-1	W5-6-2	W5-6-3	W5-8-1	W5-8-2	W5-8-3	W5-10-1	W5-10-2	W5-10-3	W5-12-1	W5-12-2	W5-12-3	mix01	mix02	mix03	mix04	cpd_ID	kegg_map
Daphnetin	Lignans and Coumarins	Coumarins	486-35-1	1	6121200	6118600	2847700	3231500	2937500	3688800	1133600	1481100	1279900	236850	233510	228450	8887.2	2945.3	4401.7	2238	3490.1	9242.6	2915000	2595300	4602700	2307000	1982700	1426700	569110	883320	767670	56018	13402	47082	4475	6675.1	16883	3798.3	8175.9	9743.1	1118800	1728200	1180300	999550	C03093	--
Epiturinol	Lignans and Coumarins	Lignans	24404-50-0	1	3299.4	7430.6	4614.1	1347.4	1827.3	364.21	1745.7	1267.7	1595.3	2864.9	856.2	1879.8	48026	56581	70174	18185	13585	19139	2699.4	3313.8	3296.6	863.22	1838.4	1849.1	5046.8	7286.4	8165.5	32007	28285	40255	86761	67780	166700	41311	38801	39348	38020	34295	29588	24075	--	--
Turbinol	Lignans and Coumarins	Lignans	487-36-5	1	3662.8	3433.1	7136.6	1011.2	1654.4	378.76	2212.7	637.46	189.81	255	263	258.41	42108	46462	57215	16030	14641	16106	2895.1	3284.9	1835.5	2429.1	1695.5	1269.6	3506.1	7632.9	8456.6	25948	26037	30274	81694	62361	144950	35417	34596	40023	31926	32871	31910	22171	C05366	ko00998,ko01100,ko01110
cephaloethin	Lignans and Coumarins	Lignans	21453-71-4	1	9	9	9	9	9	9	9	9	9	9	9	9	27497	27321	39765	59877	56263	65926	9	9	9	9	9	9	9	9	9	9	9	9	25286	16196	48287	98361	98565	108900	25046	21250	17150	26059	C10889	--
Rohan rosin phenol -4' -O-glucoside	Lignans and Coumarins	Lignans	23202-85-9	1	1746000	1536200	1325600	2124000	2335200	2637200	2317500	3025800	2898800	1905600	2220600	1716900	1489500	2173300	2730600	3747500	3577300	3094400	3550200	4017400	3939300	4182100	4395600	4594800	1792100	3238500	2849500	664480	112080	958250	368660	249280	544880	2102800	1924700	2054100	2326700	2891900	2378700	2629600	--	--
turbinol-4-O-glucoside	Lignans and Coumarins	Lignans	41607-20-9	1	263440	263950	307320	317650	311130	220000	192330	213610	218930	183340	199150	171900	161550	214660	274450	84164	99051	85751	368260	348950	402370	282170	315020	336480	115170	131120	136280	210210	221890	182430	533290	536040	900890	298750	326420	313690	420100	439370	355630	356020	C17529	--
Isobarinin-9 '-o-glucoside	Lignans and Coumarins	Lignans	63358-12-3	1	8758.8	30426	32534	59919	83386	39499	105440	142330	110440	76798	86344	74634	110010	127970	172230	85672	102450	75680	55515	76234	65134	77351	71183	73950	63876	102610	83781	140950	114960	127970	1025200	813260	1439500	537700	634940	585200	350100	359500	312080	305250	--	--
Dihydrodehydrodicarboxylate 4-O-glucoside	Lignans and Coumarins	Lignans	-	2	41044	28267	29652	65020	68959	52129	96883	111210	98820	97153	91889	77571	86281	144830	135900	83898	78985	108800	47282	49571	64395	41341	65451	46547	63296	86915	91758	151620	129830	154240	980980	811340	1497600	508330	495330	530580	288220	400570	272920	352320	--	--
Larinin-4 '-o-glucoside	Lignans and Coumarins	Lignans	143663-00-7	1	69861	91277	83553	101750	106980	65621	67927	78321	102980	74276	71652	48595	30302	36026	37662	25486	30294	26970	120660	120950	117480	122610	134540	135240	61613	79097	75025	33445	35150	49101	31013	26890	76461	68979	66087	89800	124000	99861	103460	123160	--	--
cycloisoperinolin-4-O-glucoside	Lignans and Coumarins	Lignans	-	1	408390	446010	545870	836130	769420	722750	750230	965200	921570	745030	730060	717470	315080	486060	532980	334320	456340	387310	652460	906010	710800	1242900	1467800	1445900	737960	1030300	1019100	794520	645290	803630	747110	684820	1341000	1482200	1854200	1911100	1339000	1403200	1317100	1173600	--	--
5' -methoxy-rohanoside	Lignans and Coumarins	Lignans	1691201-82-7	1	39592	33742	40742	73772	60519	38845	38446	37490	53426	51563	55891	59486	13271	25799	26780	74304	66799	65618	121560	124540	126170	96571	90271	87044	58552	59351	63084	33499	31516	34226	32449	21187	57219	158070	162890	127700	113220	91544	75404	64528	--	--
Eugenol 4' -o-glucoside	Lignans and Coumarins	Lignans	7374-79-0	2	9620.2	2405.7	5375	7935.7	4392.1	4362.9	8324.6	4305	3730.7	5439.5	7967.7	4001.3	39130	61820	58228	57128	78271	74045	11877	7555.1	13556	8433.9	3422.5	10048	1924.4	2112.3	2050.8	4022.5	9704.7	2871	21614	19627	42004	34905	58172	44693	40101	27711	27938	31609	C10890	--
Rohan rosin -4,4' -di-o-glucoside	Lignans and Coumarins	Lignans	-	2	4793.6	9447.9	7743.6	6155.2	7814.4	12276	7189.6	10494	12714	9390.7	17243	19379	1116.6	4491.2	15536	18289	27635	26988	15689	25490	12981	24011	20619	22284	13817	18959	19398	6170.6	4524.6	13878	11683	7171.1	13817	33658	32741	36479	14688	25596	19974	19423	--	--
