# Supplementary material for: Preliminary study on the association between lignan metabolites and CT non-destructive testing of coconut fruit at different developmental stages
Source: PeerJ. 2024 Sep 26;12:e18049. doi: 10.7717/peerj.18049 (PMC11439403; doi:10.7717/peerj.18049)
Supplement: Supplemental Information 2 [file peerj-12-18049-s002.xlsx]

## Sheet: CT image indexes on friut 
CT image indexes on friut for Wenye No.5 Coconut
No.	Weight	vertical axis of coconut friut			horizontal axisof coconut friut			vertical axis of coconut water			horizontal axisof coconut water			thickness of coconut shell			thickness of coconut fiber				thickness of copra		Volume of coconut water/cm3			volume cavity /cm3
		1	2	3	1	2	3	1	2	3	1	2	3	1	2	3	1	2	3	1	2	3	1	2	3	1	2	3
w5-2-1-two months	435g	11.04	11.02	11.11	8.82	8.79	8.82	6.67	6.6	6.45	6.37	6.27	6.4	0.21	0.24	0.23	0.95	0.94	0.98	non	non	non	149.09	148.81	149.22	non	non	non
w5-2-2-two months	370g	11.24	11.15	11.32	8.21	8.12	8.12	6.32	6.36	6.33	6.03	5.89	5.99	0.16	0.17	0.23	0.89	0.89	0.95	non	non	non	120.9	126.9	127.16	non	non	non
w5-4-1-four months	371g	13.4	13.41	13.47	11.14	11.15	11.1	7.49	7.45	7.48	8.64	8.5	8.58	0.24	0.22	0.22	1.21	1.28	1.3	non	non	non	258.32	218.52	277.88	non	non	non
w5-4-2-four months	775g	14.05	14.03	13.98	10.67	10.57	10.59	7.2	7.28	7.25	8.3	8.34	8.4	0.27	0.26	0.23	0.98	0.97	0.98	non	non	non	251.27	266.16	268.05	non	non	non
w5-4-3-four months	755g	12.85	12.85	12.82	10.82	10.81	10.76	7.31	7.31	7.26	8.03	7.98	8.1	0.24	0.2	0.25	1.16	1.19	1.37	non	non	non	230.54	236.49	236.98	non	non	non
w5-6-1-six months	756g	13.65	13.68	13.6	11.48	11.37	11.43	5.85	5.89	5.93	8.45	8.5	8.16	0.25	0.21	0.29	1.12	1.03	1.14	0.23	0.27	0.28	247.82	254.84	254.02	15.5	15.45	15.8
w5-6-2-six months	850g	14.27	14.46	14.39	11	10.96	11.03	5.25	5.43	5.56	7.9	7.86	7.87	0.21	0.22	0.22	1.06	1.2	1.21	0.21	0.25	0.23	250.75	225.42	225.38	16.82	16.86	17.79
w5-8-1-eight months	780g	15.41	15.42	15.47	11.65	11.68	11.68	5.8	5.74	5.86	8.47	8.48	8.4	0.29	0.23	0.25	1.04	1.12	1.19	0.31	0.27	0.23	263.12	263.09	263.06	11.98	12.32	11.98
w5-8-2-eight months	1035g	14.98	14.85	14.77	12.31	12.31	12.24	5.78	5.68	5.74	9.06	9.12	9.09	0.18	0.22	0.21	1.06	1.09	1.18	0.33	0.33	0.41	270.11	268.28	269.5	10.08	10.66	10.29
w5-10-1-ten months	1000g	17.64	17.61	17.71	11.34	11.41	11.34	3.17	3.12	3.15	6.02	6.13	5.9	0.28	0.23	0.18	1.57	1.57	1.76	0.9	0.95	1.03	88.26	100.55	93.84	18.39	21.29	21.29
w5-10-2-ten months	660g	17.43	17.14	17.48	12.48	12.52	12.32	3.45	3.54	3.45	6.56	6.65	6.58	0.26	0.26	0.22	1.54	1.63	1.63	0.96	1.02	1.08	102.96	105.45	101.56	17.97	18.93	19.09
w5-12-1-twelve months	595g	17.02	17.04	17.06	11.58	11.62	11.65	5.16	5.23	5.16	6.39	6.39	6.37	0.24	0.23	0.2	1.22	1.22	1.34	0.97	0.87	0.89	121.47	123.13	129.19	18.14	18.45	19.03
w5-12-2-twelve months	590g	15.98	15.84	15.86	11.47	11.23	11.39	4.72	4.79	4.7	6.16	6.18	6.09	0.2	0.15	0.17	1.55	1.59	1.43	0.84	0.8	0.91	102.21	109.23	104.34	26.54	26.61	26.32
w5-12-3-twelve months	555g	17.36	17.45	17.39	12.3	12.26	12.29	3.11	3.08	3.1	6.69	6.6	6.6	0.22	0.21	0.3	1.38	1.5	1.5	1.15	1.13	0.98	75.04	73.66	72.37	63.51	62.14	63.53

## Sheet: CT value of different tissues
	CT value of different tissues on coconut
	NO.	copra			coconut shell			coconut fiber			coconut water
		1	2	3	1	2	3	1	2	3	1	2	3
	w5-2-1-two months				29	28	33	-15	-11	-8	26	27	23
	w5-2-2-two months				32	33	38	-30	-9	-6	25	24	21
	w5-4-1-four months				27	26	32	-10	9	-16	13	16	25
	w5-4-2-four months				20	30	37	-37	-15	-21	14	24	16
	w5-4-3-four months				26	29	37	-40	-30	-31	20	21	24
	w5-6-1-six months	39	40	55	115	107	105	-87	-85	-53	11	19	17
	w5-6-2-six months	42	55	56	165	139	165	-59	-63	-77	28	23	22
	w5-8-1-eight months	43	52	33	103	123	115	-77	-43	-21	28	33	32
	w5-8-2-eight months	47	57	43	116	136	142	-101	-98	-67	23	17	29
	w5-10-1-ten months	36	38	41	248	186	202	-828	-814	-775	29	26	26
	w5-10-2-ten months	30	32	33	220	136	219	-827	-803	-725	19	25	28
	w5-12-1-twelve months	18	45	22	172	155	174	-812	-824	-788	16	14	19
	w5-12-2-twelve months	24	16	53	149	127	123	-785	-714	-809	19	20	9
	w5-12-3-twelve months	26	57	61	125	177	76	-742	-726	-697	15	29	28
