# Supplementary material for: Preliminary study on the association between lignan metabolites and CT non-destructive testing of coconut fruit at different developmental stages
Source: PeerJ. 2024 Sep 26;12:e18049. doi: 10.7717/peerj.18049 (PMC11439403; doi:10.7717/peerj.18049)
Supplement: Supplemental Information 3 [file peerj-12-18049-s003.xlsx]

## Sheet: CT image indexes on friut
CT image indices on friut for Hainan Tall Green Coconut
编号	weight	month	vertical axis of coconut friut			horizontal axisof coconut friut			vertical axis of coconut water			horizontal axisof coconut water			thickness of coconut shell			thickness of coconut fiber			thickness of copra			Volume of coconut water/cm3			volume cavity /cm3
			1	2	3	1	2	3	1	2	3	1	2	3	1	2	3	1	2	3	1	2	3	1	2	3	1	2	3
CK-2-1-two months	867.19	2	15.69	15.74	15.66	10.54	10.49	10.41	9.58	9.48	9.58	6.5	6.48	6.51	0.23	0.21	0.22	1.34	2.21	3.39	non	non	non	256.85	275	265.07
CK-2-3-two months	837.76		14.61	14.79	14.71	10.51	10.48	10.49	9.27	9.24	9.17	6.31	6.42	6.24	0.29	0.3	0.26	1.57	2.12	2.75	non	non	non	251.44	247.99	256.39
CK-4-1-four months	1382.81	4	16.64	16.54	16.44	12.71	12.71	12.63	10.4	10.35	10.19	8.37	8.29	8.37	0.23	0.2	0.22	1.72	2.21	3.16	non	non	non	410.48	405.67	402.94
CK-4-2-four months	1435.97		16.59	16.59	16.59	12.96	12.83	12.73	10.7	10.65	10.67	8.81	8.79	8.85	0.23	0.24	0.28	1.54	2.24	3.06	non	non	non	466.87	480.04	472.3
CK-6-1-six months	3315.21	6	19.7	19.78	19.83	18.5	18.38	18.22	11.02	11.22	11.37	12.69	12.38	12.31	0.33	0.41	0.37	2.27	2.92	3.86	non	non	non	969.55	971.18	971.18
CK-6-3-six months	3166.78		17.95	19.15	18.94	17.15	16.92	17.11	11.6	11.47	11.44	11.86	11.84	11.72	0.29	0.24	0.35	2.24	2.29	3.21	non	non	non	918.55	918.76	917.36
CK-8-1-eight months	1746.55	8	19.87	19.93	19.98	17.91	17.86	17.81	8.76	8.56	8.64	8.23	8.12	7.98	0.29	0.36	0.35	3.45	3.66	3.75	0.77	0.79	0.8	253.47	277.82	258.76
CK-8-3-eight months	1930.78		19.32	19.41	19.38	17.76	17.7	17.79	6.12	6.15	6.3	8.12	8.05	8.15	0.28	0.34	0.34	2.63	3.9	5.14	0.84	0.86	1.01	327.66	354.41	341.87
CK-10-1-ten months	1263.36	10	19.16	19.19	19.28	17.41	17.59	17.62	6.15	6.02	5.99	7.83	7.8	7.83	0.33	0.37	0.35	2.36	4.31	5.27	0.78	0.82	0.91	188.92	197.24	196.98	61.69	62.62	60.12
CK-10-3-ten months	1166.41		17.53	17.4	17.62	16.48	16.62	16.78	5.54	5.61	5.62	8.05	8.19	8.16	0.24	0.29	0.35	3.07	3.87	4.1	0.76	0.79	0.83	190.75	186.59	182.43	54.78	55.21	55.22
CK-12-1-twelve months	1143.51	12	19.72	19.62	19.65	16.12	16.3	16.33	5.71	5.78	5.82	8.33	8.33	8.36	0.21	0.24	0.38	1.93	2.82	5.48	0.86	0.86	0.95	307.86	312.66	326.08	24.02	26.47	26.83
CK-12-3-twelve months	931.26		18.14	18.25	18.51	16	16.1	16.06	5.13	5.02	4.99	8.04	8.08	8.18	0.21	0.15	0.17	2.21	2.89	5.96	0.86	1.19	1.19	204.65	196.51	203.79	27.5	23.73	24.16

## Sheet: CT value of different tissues
CT value of different tissues on coconut
NO.	胚					芽				copra					coconut shell					coconut fiber					coconut water
	1	2	3	4	5	1	2	3	5	1	2	3	4	5	1	2	3	4	5	1	2	3	4	5	1	2	3	4	5
CK-2-1															23	24	37	22	25	21	-6	1	15	-14	15	24	20	22	14
CK-2-3															32	28	38	31	24	-11	-10	15	15	-18	24	18	28	22	23
CK-4-1															12	25	14	10	19	-2	1	7	-34	-79	21	22	18	10	28
CK-4-2															32	5	15	17	18	-12	11	22	-14	-53	20	14	29	32	10
CK-6-1															22	99	33	52	-1	-69	-100	5	-34	-88	21	21	29	16	21
CK-6-3															15	77	87	18	-51	-200	-48	-181	-7	-27	30	31	4	9	28
CK-8-1										12	11	2	0	8	225	213	214	221	223	-855	-797	-854	-705	-787	28	24	27	19	28
CK-8-3										4	15	20	13	8	220	238	223	217	195	-780	-721	-801	-699	-605	22	27	25	32	18
CK-10-1										4	-14	1	-5	12	208	242	220	242	247	-767	-851	-871	-820	-823	30	34	30	30	17
CK-10-3										-13	7	-3	-17	4	242	233	212	215	235	-741	-808	-864	-838	-724	30	29	31	12	34
CK-12-1										8	2	14	12	2	201	210	226	277	224	-846	-837	-844	-877	-868	26	29	29	25	27
CK-12-3										15	8	11	13	-3	215	134	190	233	238	-910	-877	-805	-893	-888	13	16	32	18	24
