# Supplementary material for: Preliminary study on the association between lignan metabolites and CT non-destructive testing of coconut fruit at different developmental stages
Source: PeerJ journal article supplement (doi:10.7717/peerj.18049), 2024-09-26
Supplement: Supplementary_File.pdf [file Supplementary_File.pdf]

The following are the materials, images, and data records for coconut CT testing and metabolite testing. Specifically, as follows:

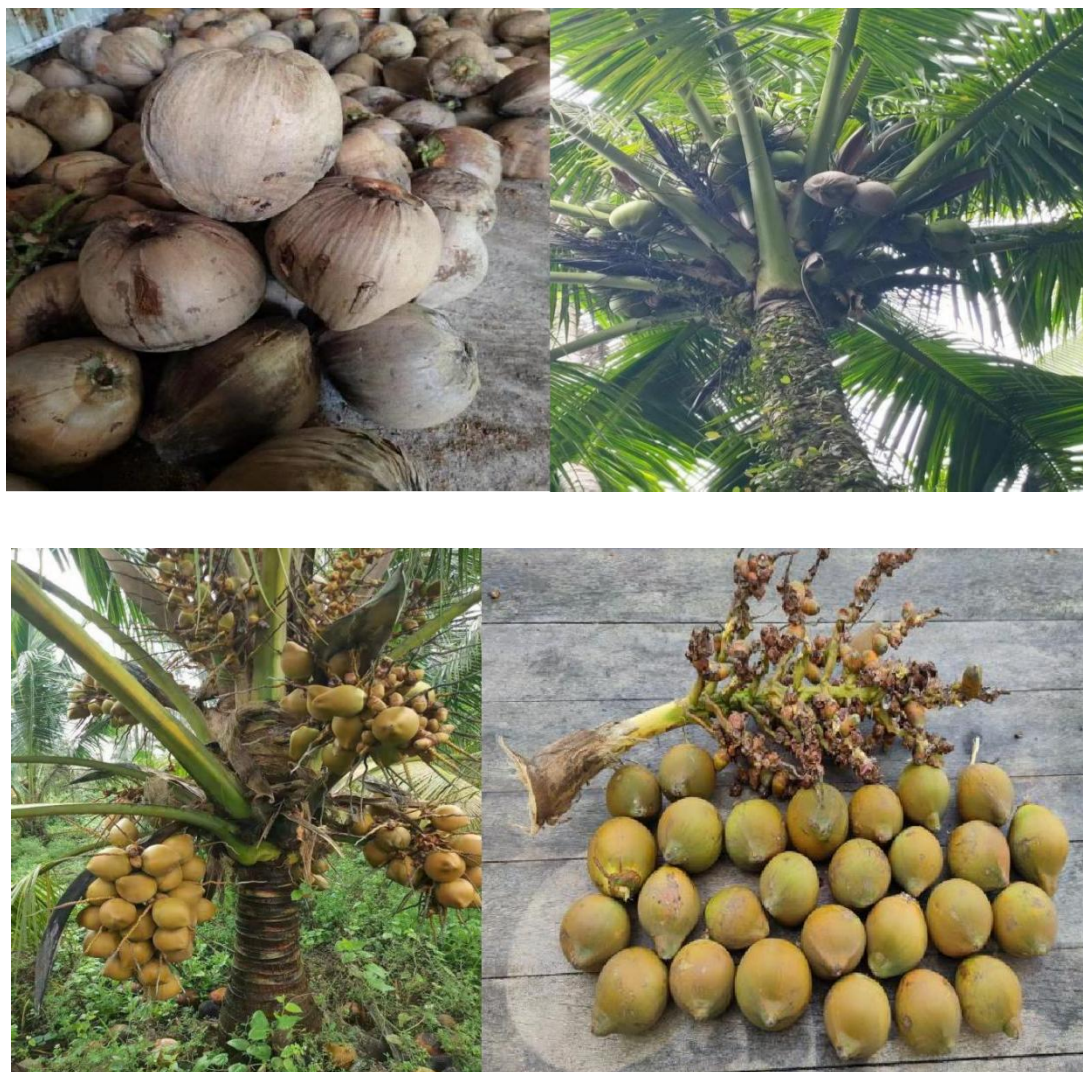

**Figure S1: Coconut material tested**

**Photographer: Chengxu Sun**

| Wen Ye 5 Coconut Variety |                                                                                                                        |
|--------------------------|------------------------------------------------------------------------------------------------------------------------|
| Fruit age                | CT images                                                                                                              |
| 2-month fruit age        | 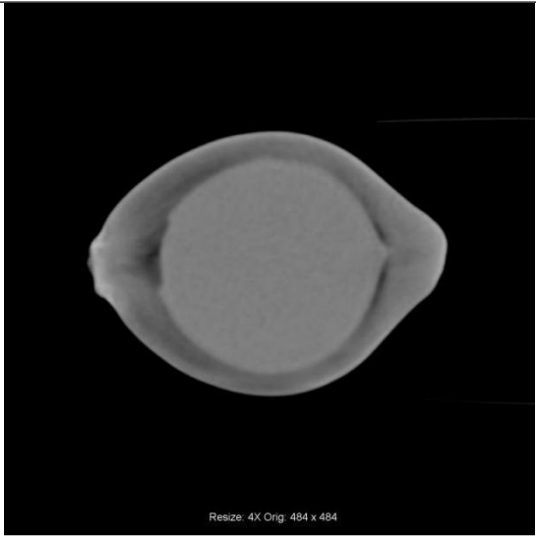 <p>Resize: 4X Orig: 484 x 484</p>   |
| 4-month fruit age        |  <p>Resize: 4X Orig: 484 x 484</p>  |
| 6-month fruit age        |  <p>Resize: 4X Orig: 484 x 484</p> |

|                    |                                                                                                                        |
|--------------------|------------------------------------------------------------------------------------------------------------------------|
| 8-month fruit age  | 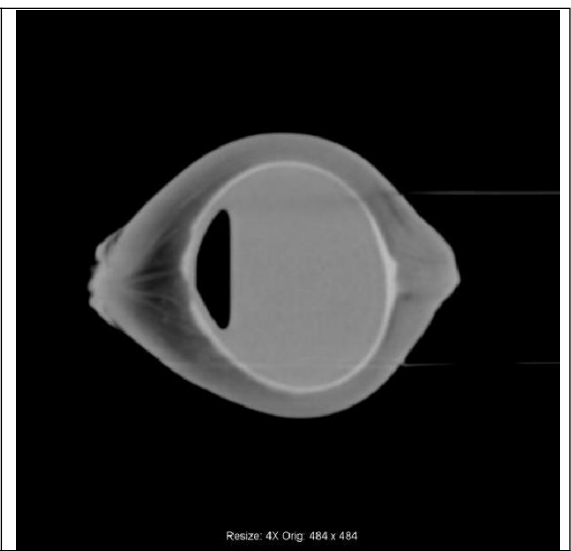 <p>Resize: 4X Orig: 484 x 484</p>   |
| 10-month fruit age |  <p>Resize: 4X Orig: 484 x 484</p>  |
| 12-month fruit age |  <p>Resize: 4X Orig: 484 x 484</p> |
|                    |                                                                                                                        |

| Hainan Local Coconut |                                                                                      |
|----------------------|--------------------------------------------------------------------------------------|
| 2-month fruit age    | 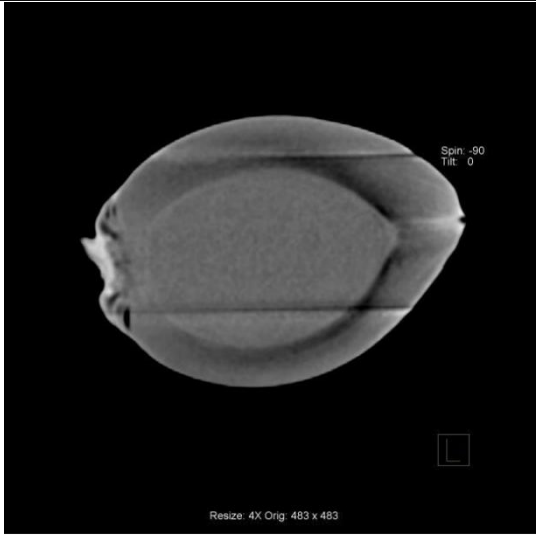   |
| 4-month fruit age    |   |
| 6-month fruit age    |  |

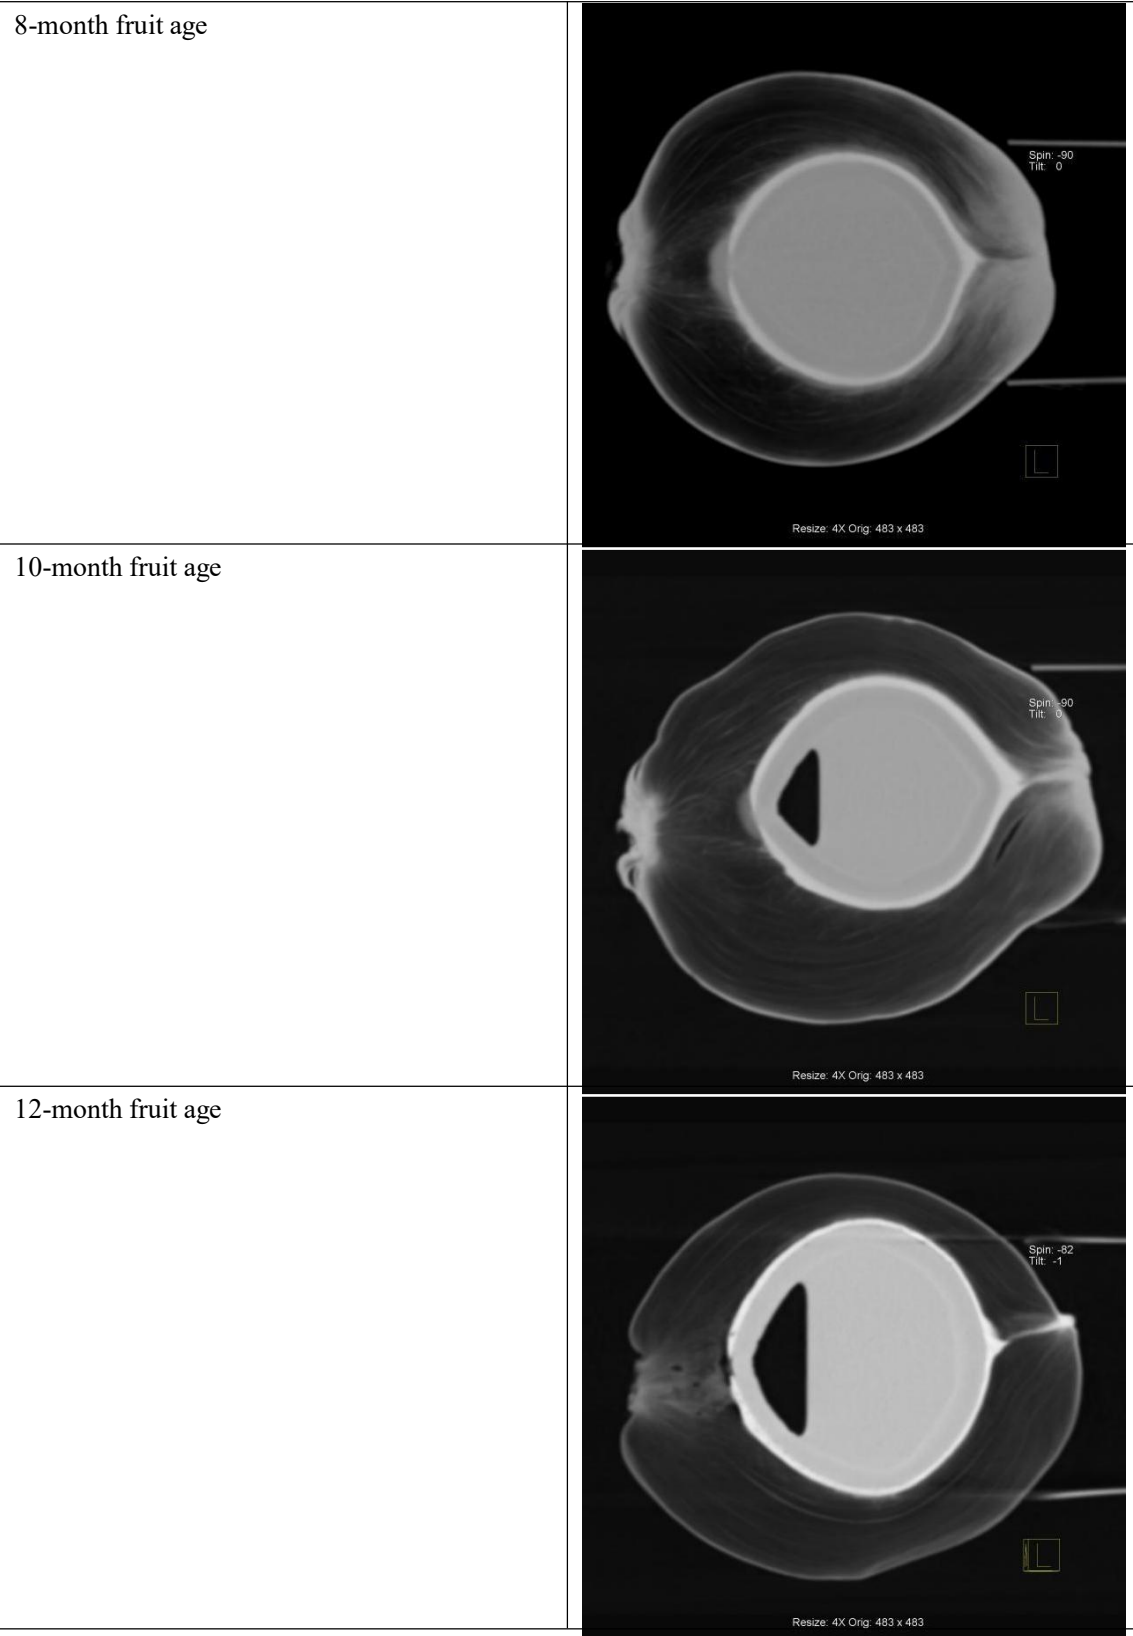

**Figure S2 CT images of different developmental stages and varieties of coconuts**

**Photographer: Chengxu Sun**



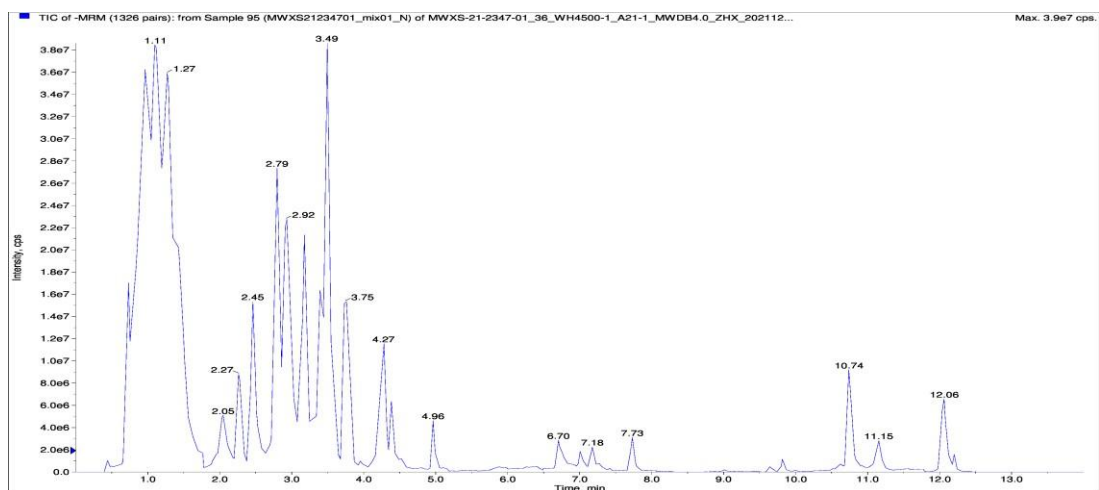

**Figure S3 Total ion flow chart for mass spectrometry analysis of mixed samples**

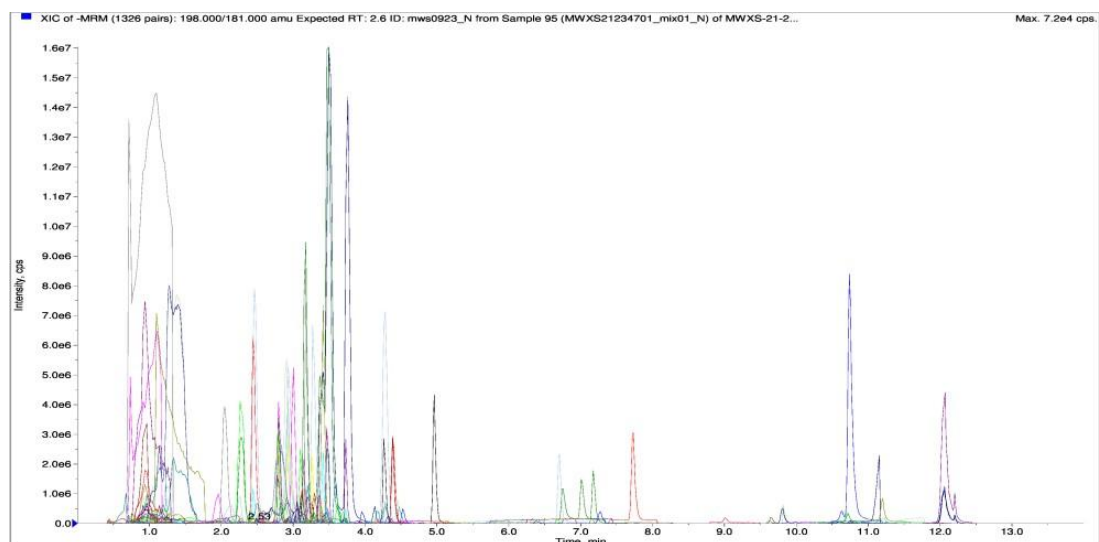

**Figure S41 Multi peak pattern of MRM metabolite detection**



**Table S1 CT test coconut data record table**

| CT value record table for various tissues of coconut variety "Wenye 5" |              |    |    |                            |     |     |                          |      |      |               |    |    |
|------------------------------------------------------------------------|--------------|----|----|----------------------------|-----|-----|--------------------------|------|------|---------------|----|----|
| ID                                                                     | Coconut meat |    |    | Coconut shell (inner skin) |     |     | Coconut fiber (mesocarp) |      |      | Coconut water |    |    |
|                                                                        | 1            | 2  | 3  | 1                          | 2   | 3   | 1                        | 2    | 3    | 1             | 2  | 3  |
| w5-2-4                                                                 |              |    |    | 29                         | 28  | 33  | -15                      | -11  | -8   | 26            | 27 | 23 |
| w5-2-5                                                                 |              |    |    | 32                         | 33  | 38  | -30                      | -9   | -6   | 25            | 24 | 21 |
| w5-4-7                                                                 |              |    |    | 27                         | 26  | 32  | -10                      | 9    | -16  | 13            | 16 | 25 |
| w5-4-8                                                                 |              |    |    | 20                         | 30  | 37  | -37                      | -15  | -21  | 14            | 24 | 16 |
| w5-4-9                                                                 |              |    |    | 26                         | 29  | 37  | -40                      | -30  | -31  | 20            | 21 | 24 |
| w5-6-4                                                                 | 39           | 40 | 55 | 115                        | 107 | 105 | -87                      | -85  | -53  | 11            | 19 | 17 |
| w5-6-5                                                                 | 42           | 55 | 56 | 165                        | 139 | 165 | -59                      | -63  | -77  | 28            | 23 | 22 |
| w5-8-4                                                                 | 43           | 52 | 33 | 103                        | 123 | 115 | -77                      | -43  | -21  | 28            | 33 | 32 |
| w5-8-5                                                                 | 47           | 57 | 43 | 116                        | 136 | 142 | -101                     | -98  | -67  | 23            | 17 | 29 |
| w5-10-1                                                                | 36           | 38 | 41 | 248                        | 186 | 202 | -828                     | -814 | -775 | 29            | 26 | 26 |
| w5-10-4                                                                | 30           | 32 | 33 | 220                        | 136 | 219 | -827                     | -803 | -725 | 19            | 25 | 28 |
| w5-12-4                                                                | 18           | 45 | 22 | 172                        | 155 | 174 | -812                     | -824 | -788 | 16            | 14 | 19 |
| w5-12-5                                                                | 24           | 16 | 53 | 149                        | 127 | 123 | -785                     | -714 | -809 | 19            | 20 | 9  |
| w5-12-6                                                                | 26           | 57 | 61 | 125                        | 177 | 76  | -742                     | -726 | -697 | 15            | 29 | 28 |

| CT value record table for various tissues of Local Coconut |              |     |    |     |    |                            |     |     |     |     |                          |      |      |      |      |               |    |    |    |    |
|------------------------------------------------------------|--------------|-----|----|-----|----|----------------------------|-----|-----|-----|-----|--------------------------|------|------|------|------|---------------|----|----|----|----|
| Identifier                                                 | Coconut meat |     |    |     |    | Coconut shell (inner skin) |     |     |     |     | Coconut fiber (mesocarp) |      |      |      |      | Coconut water |    |    |    |    |
|                                                            | 1            | 2   | 3  | 4   | 5  | 1                          | 2   | 3   | 4   | 5   | 1                        | 2    | 3    | 4    | 5    | 1             | 2  | 3  | 4  | 5  |
| CK-2-1                                                     |              |     |    |     |    | 23                         | 24  | 37  | 22  | 25  | 21                       | -6   | 1    | 15   | -14  | 15            | 24 | 20 | 22 | 14 |
| CK-2-3                                                     |              |     |    |     |    | 32                         | 28  | 38  | 31  | 24  | -11                      | -10  | 15   | 15   | -18  | 24            | 18 | 28 | 22 | 23 |
| CK-4-1                                                     |              |     |    |     |    | 12                         | 25  | 14  | 10  | 19  | -2                       | 1    | 7    | -34  | -79  | 21            | 22 | 18 | 10 | 28 |
| CK-4-2                                                     |              |     |    |     |    | 32                         | 5   | 15  | 17  | 18  | -12                      | 11   | 22   | -14  | -53  | 20            | 14 | 29 | 32 | 10 |
| CK-6-1                                                     |              |     |    |     |    | 22                         | 99  | 33  | 52  | -1  | -69                      | -100 | 5    | -34  | -88  | 21            | 21 | 29 | 16 | 21 |
| CK-6-3                                                     |              |     |    |     |    | 15                         | 77  | 87  | 18  | -51 | -200                     | -48  | -181 | -7   | -27  | 30            | 31 | 4  | 9  | 28 |
| CK-8-1                                                     | 12           | 11  | 2  | 0   | 8  | 225                        | 213 | 214 | 221 | 223 | -855                     | -797 | -854 | -705 | -787 | 28            | 24 | 27 | 19 | 28 |
| CK-8-3                                                     | 4            | 15  | 20 | 13  | 8  | 220                        | 238 | 223 | 217 | 195 | -780                     | -721 | -801 | -699 | -605 | 22            | 27 | 25 | 32 | 18 |
| CK-10-1                                                    | 4            | -14 | 1  | -5  | 12 | 208                        | 242 | 220 | 242 | 247 | -767                     | -851 | -871 | -820 | -823 | 30            | 34 | 30 | 30 | 17 |
| CK-10-3                                                    | -13          | 7   | -3 | -17 | 4  | 242                        | 233 | 212 | 215 | 235 | -741                     | -808 | -864 | -838 | -724 | 30            | 29 | 31 | 12 | 34 |
| CK-12-1                                                    | 8            | 2   | 14 | 12  | 2  | 201                        | 210 | 226 | 277 | 224 | -846                     | -837 | -844 | -877 | -868 | 26            | 29 | 29 | 25 | 27 |
| CK-12-3                                                    | 15           | 8   | 11 | 13  | -3 | 215                        | 134 | 190 | 233 | 238 | -910                     | -877 | -805 | -893 | -888 | 13            | 16 | 32 | 18 | 24 |

**Table S2 Statistical table for the number of differential metabolites**

Table: Statistical table for the number of differential metabolites

| group name    | All sig diff | down regulated | up regulated |
|---------------|--------------|----------------|--------------|
| CK10_vs_W5-10 | 304          | 199            | 105          |
| CK12_vs_W5-12 | 252          | 83             | 169          |
| CK2_vs_W5-2   | 319          | 121            | 198          |
| CK4_vs_W5-4   | 240          | 74             | 166          |
| CK6_vs_W5-6   | 232          | 124            | 108          |
| CK8_vs_W5-8   | 266          | 201            | 65           |
| CK_vs_W5      | 92           | 54             | 38           |
